# Supplementary material for: 1,2,4-triazine derived binuclear lead(ii) complexes: synthesis, spectroscopic and structural investigations and application in organic light-emitting diodes (OLEDs)
Source: Royal Society of Chemistry journal article supplement (doi:10.1039/d4ra03383c), 2024-01-01
Supplement: d4ra03383c1.pdf [file d4ra03383c1.pdf]

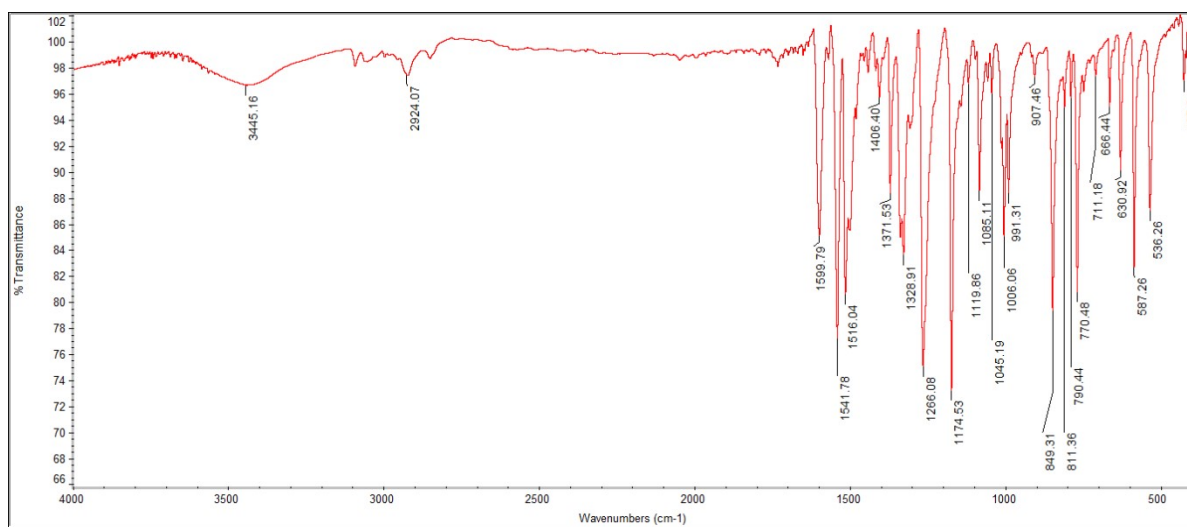

Figure S1: FT-IR spectrum of **1**.

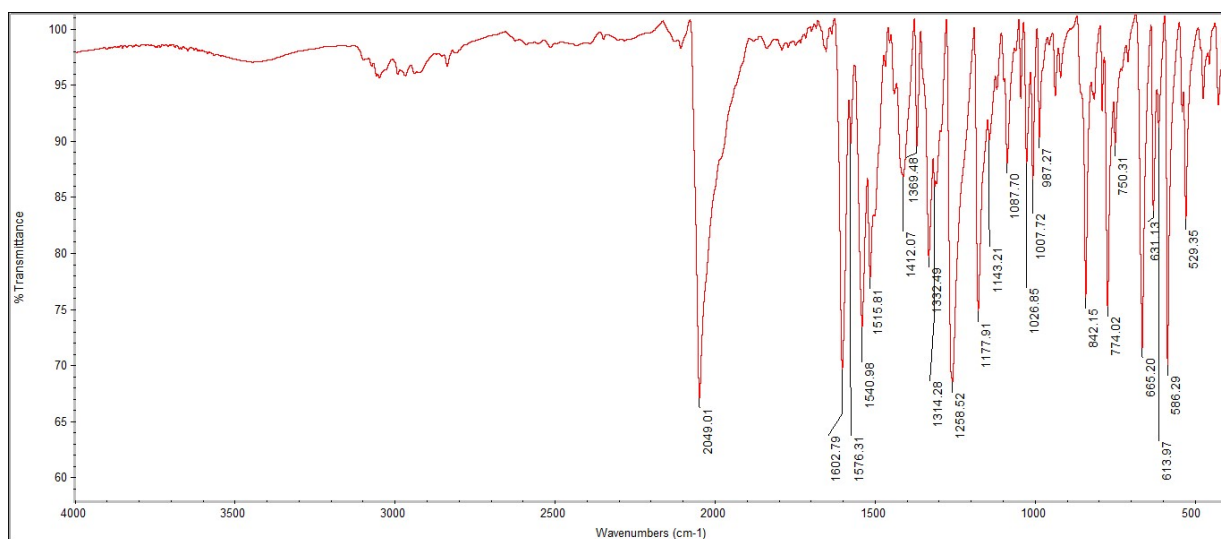

Figure S2: FT-IR spectrum of **2**.

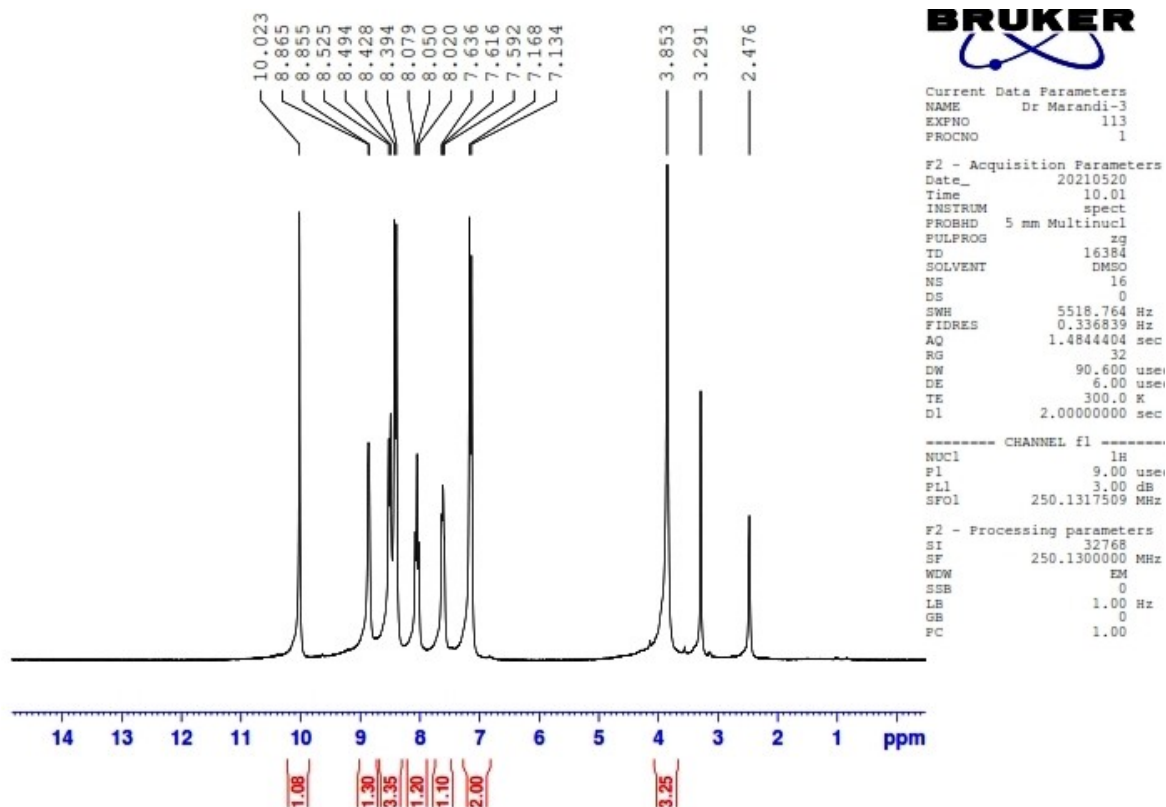

Figure S3: 250 MHz  $^1\text{H}$  NMR spectrum of **1** in  $\text{DMSO-}d_6$ .

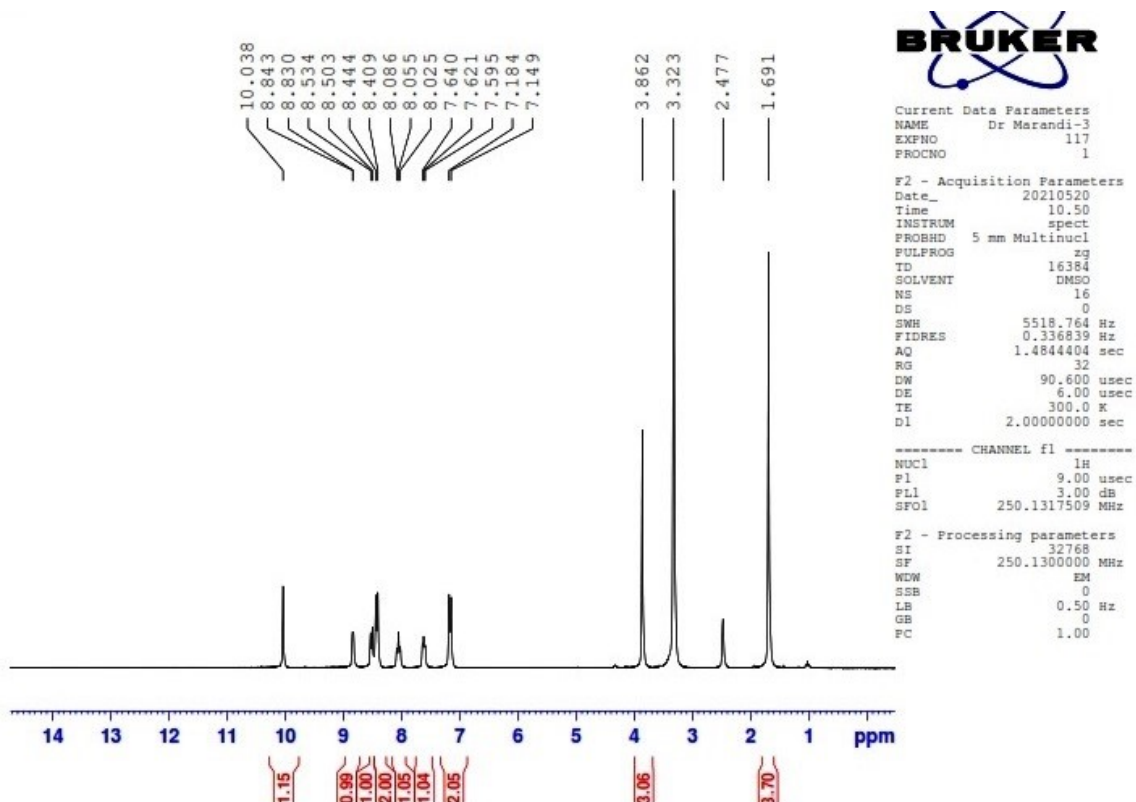

Figure S4: 250 MHz  $^1\text{H}$  NMR spectrum of **2** in  $\text{DMSO-}d_6$ .

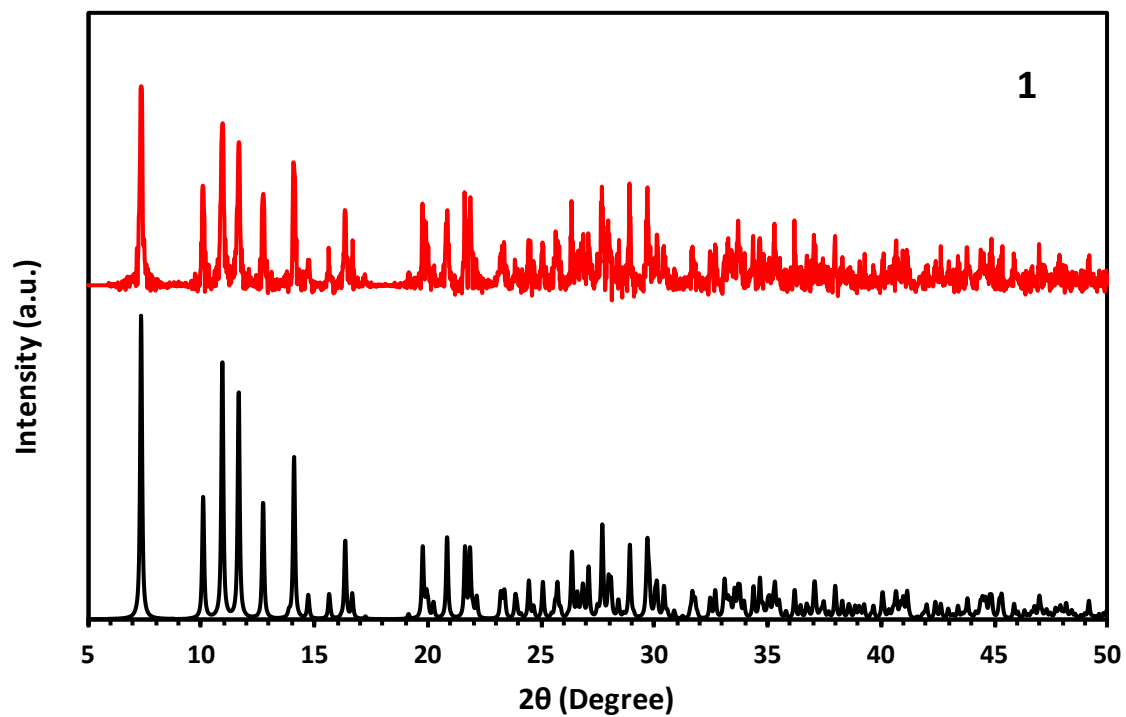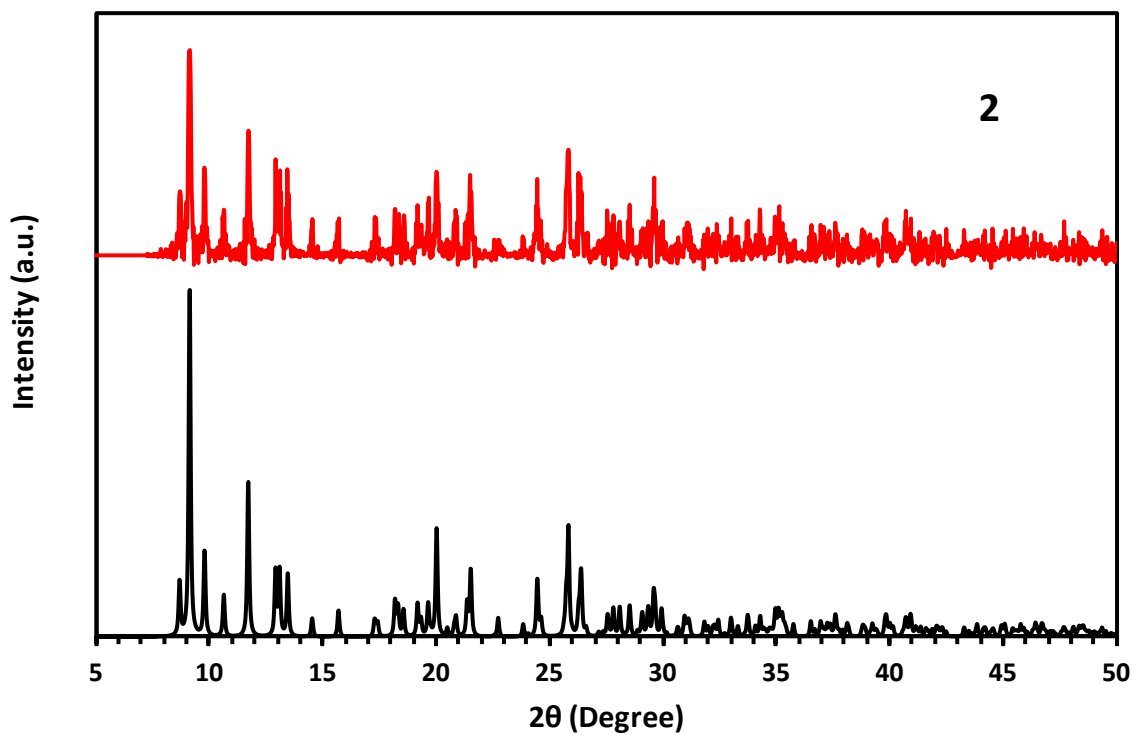

Figure S5. Experimental (in red) and simulated (in black) powder X-ray diffraction patterns of **1** and **2**. The simulated pattern is based on the structure refined by single-crystal X-ray diffraction analysis.

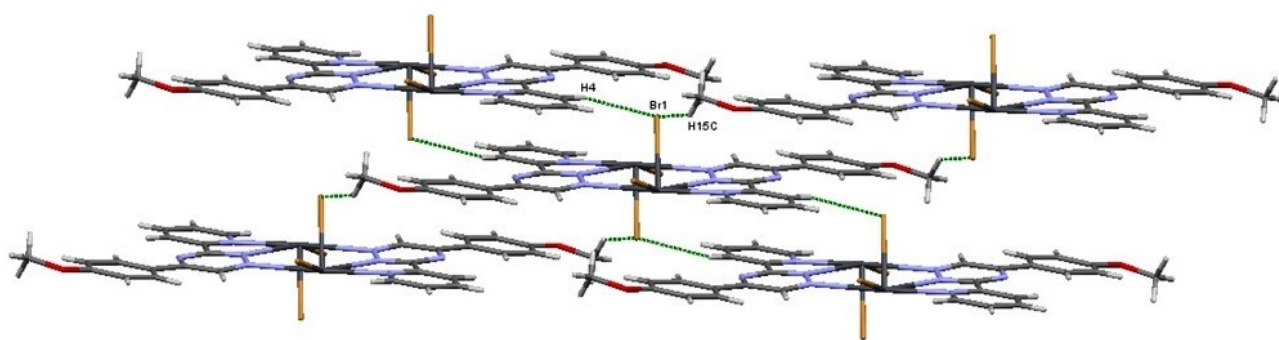

(a) •

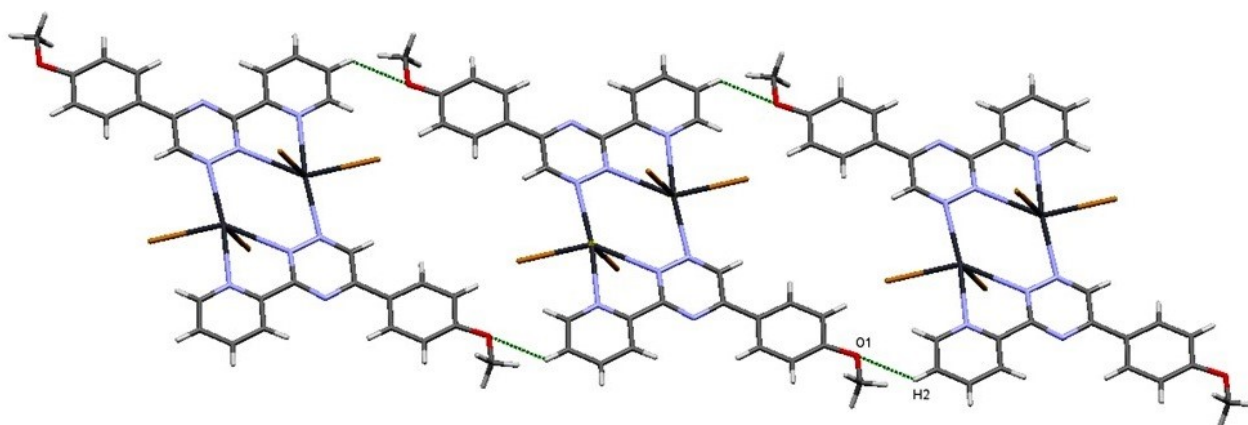

(b) •

Figure S6: Crystal packing in **1** by a) C-H...Br b) C-H...O intermolecular interactions.

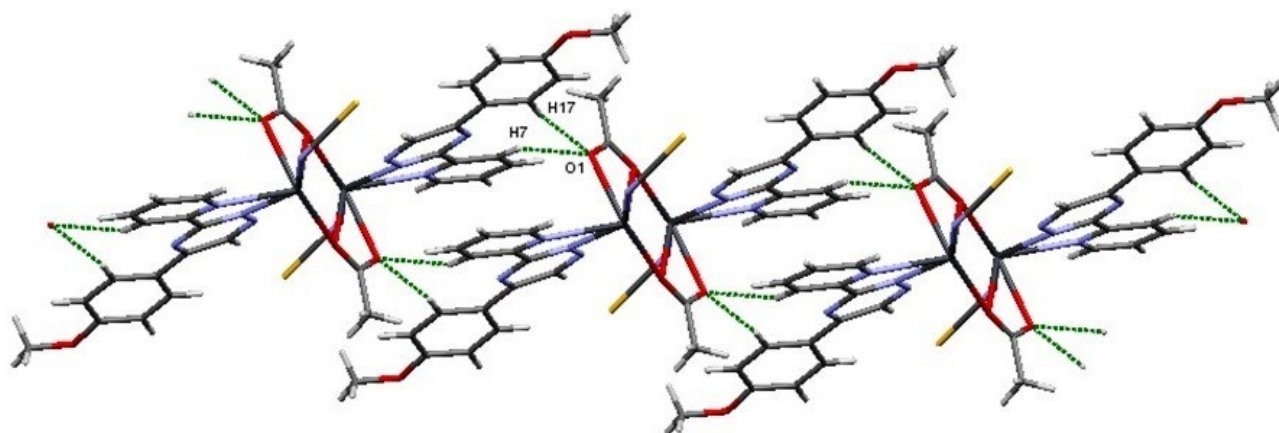

Figure S7: Crystal packing by C-H...O intermolecular interactions and  $\pi$ - $\pi$  stacking in **2**
